# Supplementary material for: Aerosol Jet Printing of 3D Pillar Arrays from Photopolymer Ink
Source: MDPI journal article supplement (doi:10.3390/polym14163411), 2022-08-20
Supplement: s1 [file s1]

| Filled hexagons design   |     |                                                                                     |                                                                                     |                                                                                      |                                                                                       |
|--------------------------|-----|-------------------------------------------------------------------------------------|-------------------------------------------------------------------------------------|--------------------------------------------------------------------------------------|---------------------------------------------------------------------------------------|
|                          |     | Reactive plasma cleaning thickness (μm)                                             |                                                                                     |                                                                                      |                                                                                       |
|                          |     | 0 (ref. sample)                                                                     | 1                                                                                   | 3                                                                                    | 5                                                                                     |
| Number of printed layers | 1   | 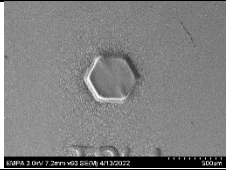   |    |    |    |
|                          | 3   |    |    |    |    |
|                          | 5   |    |    |    |    |
|                          | 10  |    |    |    |    |
|                          | 25  |   |   |   |   |
|                          | 50  |  |  |  |  |
|                          | 75  |  |  |  |  |
|                          | 100 |  |  |  |  |

| Hollowed hexagons design                |     |                                                                                     |                                                                                     |                                                                                      |                                                                                       |
|-----------------------------------------|-----|-------------------------------------------------------------------------------------|-------------------------------------------------------------------------------------|--------------------------------------------------------------------------------------|---------------------------------------------------------------------------------------|
| Reactive plasma cleaning thickness (μm) |     |                                                                                     |                                                                                     |                                                                                      |                                                                                       |
|                                         |     | 0 (ref. sample)                                                                     | 1                                                                                   | 3                                                                                    | 5                                                                                     |
| Number of printed layers                | 1   |    |    |    | -                                                                                     |
|                                         | 3   |    |    |    |    |
|                                         | 5   |    |    |    |    |
|                                         | 10  |    |    |    |    |
|                                         | 25  |   |   |   |   |
|                                         | 50  |  |  |  |  |
|                                         | 75  |  |  |  |  |
|                                         | 100 |  |  |  |  |



| Filled hexagons design (height measurement*) |     |                                                                                     |                                                                                      |
|----------------------------------------------|-----|-------------------------------------------------------------------------------------|--------------------------------------------------------------------------------------|
| Reactive plasma cleaning thickness (μm)      |     |                                                                                     |                                                                                      |
|                                              |     | 0 (ref. sample)                                                                     | 5                                                                                    |
| Number of printed layers                     | 1   | 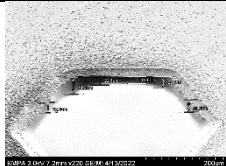   |    |
|                                              | 3   |    |    |
|                                              | 5   |    |    |
|                                              | 10  |    |    |
|                                              | 25  |   |   |
|                                              | 50  |  |  |
|                                              | 75  |  |  |
|                                              | 100 |  |  |

\*SEM stage at 50 degrees inclination

| Filled hexagons design (height measurement*<br>averaged values) |     |                  |                  |
|-----------------------------------------------------------------|-----|------------------|------------------|
| Reactive plasma cleaning thickness (μm)                         |     |                  |                  |
|                                                                 |     | 0 (ref. sample)  | 5                |
| Number of printed<br>layers                                     | 1   | 22.5; 18.0; 26.2 | 12.9; 9.0; 11.3  |
|                                                                 | 3   | 96.4; 69.5; 84.4 | 72.3; 64.5; 65.5 |
|                                                                 | 5   | 96.4; 98.2; 89.4 | 80.5; 70.6; 77.2 |
|                                                                 | 10  | 187; 172; 152    | 106; 118; 128    |
|                                                                 | 25  | 360; 357; 350    | 141; 149; 158    |
|                                                                 | 50  | 342; 336; 307    | 209; 221; 204    |
|                                                                 | 75  | 348; 364; 314    | 201; 221; 212    |
|                                                                 | 100 | 360; 372; 398    | 253; 281; 278    |

| Hollowed hexagons design (height measurement*) |     |                                                                                     |                                                                                      |
|------------------------------------------------|-----|-------------------------------------------------------------------------------------|--------------------------------------------------------------------------------------|
| Reactive plasma cleaning thickness (μm)        |     |                                                                                     |                                                                                      |
|                                                |     | 0 (ref. sample)                                                                     | 5                                                                                    |
| Number of printed layers                       | 1   | 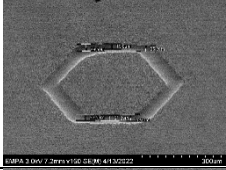   | Structure totally removed                                                            |
|                                                | 3   |    |    |
|                                                | 5   |    |    |
|                                                | 10  |    |    |
|                                                | 25  |   |   |
|                                                | 50  |  |  |
|                                                | 75  |  |  |
|                                                | 100 |  |  |

\*SEM stage at 50 degrees inclination

| Hollowed hexagons design (height measurement*<br>averaged values) |     |                  |                  |
|-------------------------------------------------------------------|-----|------------------|------------------|
| Reactive plasma cleaning thickness (μm)                           |     |                  |                  |
|                                                                   |     | 0 (ref. sample)  | 5                |
| Number of printed<br>layers                                       | 1   | 26.5;19.8;25.2   | -                |
|                                                                   | 3   | 32.0;21.1; 26.5  | 20.8; 18.0; 15.3 |
|                                                                   | 5   | 41.0; 38.4; 37.1 | 27.8; 23.8; 26.8 |
|                                                                   | 10  | 55.1; 72.8; 68.3 | 39.7; 46.6; 40.7 |
|                                                                   | 25  | 157; 127; 141    | 31.9; 31.7; 38.7 |
|                                                                   | 50  | 159; 121; 143    | 97.0; 95.9; 100  |
|                                                                   | 75  | 169; 122; 144    | 115; 114; 101    |
|                                                                   | 100 | 153; 126; 138    | 142; 115; 126    |
